# Supplementary material
Source: publisher figshare collection journal article supplement (https://acs.figshare.com/ndownloader/files/4254619)
Supplement: Supplementary file 1 [file 4254619]

 

 
 
 
 
 
 
 
 
data_jm1011 
 
_audit_creation_method            SHELXL-97 
_chemical_name_systematic 
; 
 ? 
; 
_chemical_name_common             ? 
_chemical_melting_point           ? 
_chemical_formula_moiety
 'C35 H61 Br N2 P2 Pd2, 0.5(C6 H14), C H2 Cl2' 
_chemical_formula_sum 
 'C39 H70 Br Cl2 N2 P2 Pd2' 
_chemical_formula_weight          992.52 
 
loop_ 
 _atom_type_symbol 
 _atom_type_description 
 _atom_type_scat_dispersion_real 
 _atom_type_scat_dispersion_imag 
 _atom_type_scat_source 
 'C'  'C'   0.0033   0.0016 
 'International Tables Vol C Tables 4.2.6.8 and 6.1.1.4' 
 'H'  'H'   0.0000   0.0000 
 'International Tables Vol C Tables 4.2.6.8 and 6.1.1.4' 
 'P'  'P'   0.1023   0.0942 
 'International Tables Vol C Tables 4.2.6.8 and 6.1.1.4' 
 'Pd'  'Pd'  -0.9988   1.0072 
 'International Tables Vol C Tables 4.2.6.8 and 6.1.1.4' 
 'N'  'N'   0.0061   0.0033 
 'International Tables Vol C Tables 4.2.6.8 and 6.1.1.4' 
 'Cl'  'Cl'   0.1484   0.1585 
 'International Tables Vol C Tables 4.2.6.8 and 6.1.1.4' 
 'Br'  'Br'  -0.2901   2.4595 
 'International Tables Vol C Tables 4.2.6.8 and 6.1.1.4' 
 
_symmetry_cell_setting            monoclinic 
_symmetry_space_group_name_H-M    P2(1)/n
_symmetry_space_group_name_Hall   '-P 2yn'
 
loop_ 
 _symmetry_equiv_pos_as_xyz 
 'x, y, z' 
 '-x+1/2, y+1/2, -z+1/2' 
 '-x, -y, -z' 
 'x-1/2, -y-1/2, z-1/2' 
 
_cell_length_a                    11.0675(2) 
_cell_length_b                    21.9913(5) 
_cell_length_c                    18.8256(4) 
_cell_angle_alpha                 90.00 
_cell_angle_beta                  106.785(1) 
_cell_angle_gamma                 90.00 
_cell_volume                      4386.72(16) 
_cell_formula_units_Z             4 
_cell_measurement_temperature     180(2) 
_cell_measurement_reflns_used     53461
_cell_measurement_theta_min       1.00 
_cell_measurement_theta_max       27.88 
 
_exptl_crystal_description        block 
_exptl_crystal_colour             colourless 
_exptl_crystal_size_max           0.18 
_exptl_crystal_size_mid           0.16 
_exptl_crystal_size_min           0.07 
_exptl_crystal_density_meas       ? 
_exptl_crystal_density_diffrn     1.503 
_exptl_crystal_density_method     'not measured' 
_exptl_crystal_F_000              2036 
_exptl_absorpt_coefficient_mu     1.954 
_exptl_absorpt_correction_type 'multi-scan' 
_exptl_absorpt_correction_T_min  0.816
_exptl_absorpt_correction_T_max  0.923
_exptl_absorpt_process_details
;
multi-scan from symmetry-related measurements 
 Sortav (Blessing 1995)
;
 
_exptl_special_details 
; 
 The hexane solvent molecule is poorly resolved, disordered about
 a special position: a common, isotropic displacement parameter was
 assigned to the carbon atoms of this moiety, together with severe
 bond length constraints (JED).
; 
 
_diffrn_ambient_temperature       180(2) 
_diffrn_radiation_wavelength      0.71073 
_diffrn_radiation_type            MoK\a 
_diffrn_radiation_source          'fine-focus sealed tube'
_diffrn_measurement_device_type   'Nonius Kappa CCD'
_diffrn_measurement_method        'Thin slice \w and \f scans'
_diffrn_reflns_number             24554 
_diffrn_reflns_av_R_equivalents   0.0420 
_diffrn_reflns_av_sigmaI/netI     0.0829 
_diffrn_reflns_limit_h_min        -14 
_diffrn_reflns_limit_h_max        13 
_diffrn_reflns_limit_k_min        -28 
_diffrn_reflns_limit_k_max        28 
_diffrn_reflns_limit_l_min        -24 
_diffrn_reflns_limit_l_max        24 
_diffrn_reflns_theta_min          3.52 
_diffrn_reflns_theta_max          27.87 
_reflns_number_total              10054 
_reflns_number_gt                 6184 
_reflns_threshold_expression      >2sigma(I) 
 
_computing_data_collection        'Collect (Nonius B.V. 1998)'
_computing_cell_refinement        'HKL Scalepack (Otwinowski & Minor 1997)' 
_computing_data_reduction
;
 HKL Denzo and Scalepack (Otwinowski & Minor 1997)
;
_computing_structure_solution     'SIR-92 (Altomare et al. 1994)'
_computing_structure_refinement   'SHELXL-97 (Sheldrick 1997)' 
_computing_publication_material   'SHELXL-97 (Sheldrick 1997)' 
 
_refine_special_details 
; 
 Refinement of F^2^ against ALL reflections.  The weighted R-factor wR and 
 goodness of fit S are based on F^2^, conventional R-factors R are based 
 on F, with F set to zero for negative F^2^. The threshold expression of 
 F^2^ > 2sigma(F^2^) is used only for calculating R-factors(gt) etc. and is 
 not relevant to the choice of reflections for refinement.  R-factors based 
 on F^2^ are statistically about twice as large as those based on F, and R- 
 factors based on ALL data will be even larger. 
; 
 
_refine_ls_structure_factor_coef  Fsqd  
_refine_ls_matrix_type            full 
_refine_ls_weighting_scheme       calc  
_refine_ls_weighting_details 
 'calc w=1/[\s^2^(Fo^2^)+(0.0764P)^2^+0.0000P] where P=(Fo^2^+2Fc^2^)/3' 
_atom_sites_solution_primary      direct 
_atom_sites_solution_secondary    difmap 
_atom_sites_solution_hydrogens    geom 
_refine_ls_hydrogen_treatment     constr
_refine_ls_extinction_method      none 
_refine_ls_extinction_coef        ? 
_refine_ls_number_reflns          10054 
_refine_ls_number_parameters      441 
_refine_ls_number_restraints      9 
_refine_ls_R_factor_all           0.0769 
_refine_ls_R_factor_gt            0.0451 
_refine_ls_wR_factor_ref          0.1419 
_refine_ls_wR_factor_gt           0.1363 
_refine_ls_goodness_of_fit_ref    1.014 
_refine_ls_restrained_S_all       1.014 
_refine_ls_shift/su_max           0.610 
_refine_ls_shift/su_mean          0.009 
 
loop_ 
 _atom_site_label 
 _atom_site_type_symbol 
 _atom_site_fract_x 
 _atom_site_fract_y 
 _atom_site_fract_z 
 _atom_site_U_iso_or_equiv 
 _atom_site_adp_type 
 _atom_site_occupancy 
 _atom_site_symmetry_multiplicity 
 _atom_site_calc_flag 
 _atom_site_refinement_flags 
 _atom_site_disorder_assembly 
 _atom_site_disorder_group 
Pd1 Pd 0.61727(3) 0.089604(17) 0.23124(2) 0.03634(13) Uani 1 1 d . . . 
Pd2 Pd 0.45109(3) 0.004125(17) 0.23301(2) 0.03495(12) Uani 1 1 d . . . 
Br1 Br 0.39279(5) 0.11601(2) 0.22718(3) 0.04311(16) Uani 1 1 d . . . 
P1 P 0.74728(12) 0.17339(6) 0.24691(8) 0.0384(3) Uani 1 1 d . . . 
P2 P 0.29589(11) -0.05879(6) 0.25114(7) 0.0336(3) Uani 1 1 d . . . 
N1 N 1.1002(4) 0.16525(19) 0.0527(2) 0.0429(11) Uani 1 1 d . . . 
N2 N 0.2300(5) -0.2894(2) 0.0675(2) 0.0503(12) Uani 1 1 d . . . 
C1 C 0.8388(5) 0.1821(3) 0.3493(3) 0.0526(15) Uani 1 1 d . . . 
C2 C 0.9455(6) 0.1356(3) 0.3653(3) 0.0604(17) Uani 1 1 d . . . 
H2A H 0.9876 0.1344 0.4188 0.091 Uiso 1 1 calc R . . 
H2B H 1.0065 0.1472 0.3390 0.091 Uiso 1 1 calc R . . 
H2C H 0.9109 0.0954 0.3485 0.091 Uiso 1 1 calc R . . 
C3 C 0.8927(6) 0.2434(3) 0.3766(4) 0.0651(18) Uani 1 1 d . . . 
H3A H 0.9272 0.2424 0.4308 0.098 Uiso 1 1 calc R . . 
H3B H 0.8260 0.2742 0.3625 0.098 Uiso 1 1 calc R . . 
H3C H 0.9600 0.2535 0.3544 0.098 Uiso 1 1 calc R . . 
C4 C 0.7447(7) 0.1645(3) 0.3935(3) 0.070(2) Uani 1 1 d . . . 
H4A H 0.7795 0.1770 0.4454 0.106 Uiso 1 1 calc R . . 
H4B H 0.7315 0.1204 0.3911 0.106 Uiso 1 1 calc R . . 
H4C H 0.6640 0.1852 0.3719 0.106 Uiso 1 1 calc R . . 
C5 C 0.6591(5) 0.2460(2) 0.2104(3) 0.0491(14) Uani 1 1 d . . . 
C6 C 0.7455(6) 0.2994(2) 0.2047(4) 0.0608(17) Uani 1 1 d . . . 
H6A H 0.6938 0.3337 0.1797 0.091 Uiso 1 1 calc R . . 
H6B H 0.8024 0.2868 0.1761 0.091 Uiso 1 1 calc R . . 
H6C H 0.7951 0.3118 0.2546 0.091 Uiso 1 1 calc R . . 
C7 C 0.5758(6) 0.2649(3) 0.2601(4) 0.0676(19) Uani 1 1 d . . . 
H7A H 0.5177 0.2972 0.2355 0.101 Uiso 1 1 calc R . . 
H7B H 0.6297 0.2799 0.3078 0.101 Uiso 1 1 calc R . . 
H7C H 0.5274 0.2297 0.2684 0.101 Uiso 1 1 calc R . . 
C8 C 0.5732(5) 0.2310(3) 0.1327(3) 0.0567(16) Uani 1 1 d . . . 
H8A H 0.5187 0.2660 0.1133 0.085 Uiso 1 1 calc R . . 
H8B H 0.5209 0.1957 0.1355 0.085 Uiso 1 1 calc R . . 
H8C H 0.6250 0.2219 0.0997 0.085 Uiso 1 1 calc R . . 
C9 C 0.1312(4) -0.0257(2) 0.2155(3) 0.0392(12) Uani 1 1 d . . . 
C10 C 0.1210(5) -0.0030(2) 0.1360(3) 0.0433(13) Uani 1 1 d . . . 
H10A H 0.0367 0.0139 0.1135 0.065 Uiso 1 1 calc R . . 
H10B H 0.1353 -0.0371 0.1059 0.065 Uiso 1 1 calc R . . 
H10C H 0.1846 0.0285 0.1383 0.065 Uiso 1 1 calc R . . 
C11 C 0.1165(5) 0.0306(2) 0.2620(3) 0.0477(14) Uani 1 1 d . . . 
H11A H 0.0407 0.0533 0.2355 0.072 Uiso 1 1 calc R . . 
H11B H 0.1908 0.0568 0.2698 0.072 Uiso 1 1 calc R . . 
H11C H 0.1085 0.0171 0.3101 0.072 Uiso 1 1 calc R . . 
C12 C 0.0239(5) -0.0713(3) 0.2109(3) 0.0485(14) Uani 1 1 d . . . 
H12A H -0.0573 -0.0522 0.1859 0.073 Uiso 1 1 calc R . . 
H12B H 0.0247 -0.0835 0.2611 0.073 Uiso 1 1 calc R . . 
H12C H 0.0358 -0.1072 0.1829 0.073 Uiso 1 1 calc R . . 
C13 C 0.3348(5) -0.0777(2) 0.3539(3) 0.0449(13) Uani 1 1 d . . . 
C14 C 0.4430(6) -0.1246(3) 0.3712(3) 0.0581(16) Uani 1 1 d . . . 
H14A H 0.4729 -0.1316 0.4248 0.087 Uiso 1 1 calc R . . 
H14B H 0.5125 -0.1090 0.3539 0.087 Uiso 1 1 calc R . . 
H14C H 0.4122 -0.1629 0.3458 0.087 Uiso 1 1 calc R . . 
C15 C 0.2277(6) -0.1022(3) 0.3826(3) 0.0563(15) Uani 1 1 d . . . 
H15A H 0.2571 -0.1053 0.4368 0.084 Uiso 1 1 calc R . . 
H15B H 0.2022 -0.1424 0.3612 0.084 Uiso 1 1 calc R . . 
H15C H 0.1555 -0.0744 0.3680 0.084 Uiso 1 1 calc R . . 
C16 C 0.3868(6) -0.0182(3) 0.3968(3) 0.0635(17) Uani 1 1 d . . . 
H16A H 0.4252 -0.0276 0.4494 0.095 Uiso 1 1 calc R . . 
H16B H 0.3175 0.0108 0.3918 0.095 Uiso 1 1 calc R . . 
H16C H 0.4505 -0.0002 0.3763 0.095 Uiso 1 1 calc R . . 
C17 C 0.8635(4) 0.1697(2) 0.1940(3) 0.0370(12) Uani 1 1 d . . . 
C18 C 0.9773(5) 0.2020(2) 0.2104(3) 0.0399(12) Uani 1 1 d . . . 
H18 H 1.0014 0.2263 0.2539 0.048 Uiso 1 1 calc R . . 
C19 C 1.0547(5) 0.1995(2) 0.1656(3) 0.0414(12) Uani 1 1 d . . . 
H19 H 1.1327 0.2208 0.1798 0.050 Uiso 1 1 calc R . . 
C20 C 1.0220(5) 0.1662(2) 0.0988(3) 0.0385(12) Uani 1 1 d . . . 
C21 C 0.9077(4) 0.1342(2) 0.0825(3) 0.0343(11) Uani 1 1 d . . . 
H21 H 0.8818 0.1106 0.0384 0.041 Uiso 1 1 calc R . . 
C22 C 0.8324(4) 0.1363(2) 0.1291(3) 0.0363(12) Uani 1 1 d . . . 
H22 H 0.7557 0.1138 0.1161 0.044 Uiso 1 1 calc R . . 
C23 C 0.2802(4) -0.1302(2) 0.2008(3) 0.0334(11) Uani 1 1 d . . . 
C24 C 0.3155(4) -0.1325(2) 0.1355(3) 0.0336(11) Uani 1 1 d . . . 
H24 H 0.3520 -0.0974 0.1206 0.040 Uiso 1 1 calc R . . 
C25 C 0.2993(4) -0.1841(2) 0.0913(3) 0.0380(12) Uani 1 1 d . . . 
H25 H 0.3247 -0.1833 0.0472 0.046 Uiso 1 1 calc R . . 
C26 C 0.2458(4) -0.2375(2) 0.1104(3) 0.0380(12) Uani 1 1 d . . . 
C27 C 0.2121(4) -0.2362(2) 0.1762(3) 0.0370(12) Uani 1 1 d . . . 
H27 H 0.1790 -0.2718 0.1923 0.044 Uiso 1 1 calc R . . 
C28 C 0.2263(4) -0.1834(2) 0.2189(3) 0.0366(11) Uani 1 1 d . . . 
H28 H 0.1983 -0.1835 0.2620 0.044 Uiso 1 1 calc R . . 
C29 C 1.1936(5) 0.2131(3) 0.0603(3) 0.0549(15) Uani 1 1 d . . . 
H29A H 1.2528 0.2117 0.1103 0.082 Uiso 1 1 calc R . . 
H29B H 1.1512 0.2527 0.0522 0.082 Uiso 1 1 calc R . . 
H29C H 1.2397 0.2070 0.0236 0.082 Uiso 1 1 calc R . . 
C30 C 1.0536(5) 0.1365(3) -0.0188(3) 0.0559(16) Uani 1 1 d . . . 
H30A H 1.0282 0.0947 -0.0123 0.084 Uiso 1 1 calc R . . 
H30B H 1.1202 0.1361 -0.0436 0.084 Uiso 1 1 calc R . . 
H30C H 0.9807 0.1592 -0.0491 0.084 Uiso 1 1 calc R . . 
C31 C 0.2468(6) -0.2867(3) -0.0060(3) 0.0545(15) Uani 1 1 d . . . 
H31A H 0.3356 -0.2785 -0.0018 0.082 Uiso 1 1 calc R . . 
H31B H 0.1941 -0.2542 -0.0345 0.082 Uiso 1 1 calc R . . 
H31C H 0.2221 -0.3257 -0.0312 0.082 Uiso 1 1 calc R . . 
C32 C 0.1740(7) -0.3421(3) 0.0877(3) 0.0608(17) Uani 1 1 d . . . 
H32A H 0.2233 -0.3553 0.1374 0.091 Uiso 1 1 calc R . . 
H32B H 0.1726 -0.3746 0.0519 0.091 Uiso 1 1 calc R . . 
H32C H 0.0875 -0.3328 0.0879 0.091 Uiso 1 1 calc R . . 
C33 C 0.7485(5) 0.0221(2) 0.2330(3) 0.0472(14) Uani 1 1 d . . . 
H33A H 0.7918 0.0203 0.2845 0.057 Uiso 1 1 calc R . . 
H33B H 0.7749 0.0500 0.2020 0.057 Uiso 1 1 calc R . . 
C34 C 0.6453(5) -0.0168(3) 0.2027(4) 0.0634(18) Uani 1 1 d . . . 
H34 H 0.6073 -0.0122 0.1508 0.076 Uiso 1 1 calc R . . 
C35 C 0.5901(5) -0.0608(3) 0.2365(4) 0.0519(15) Uani 1 1 d . . . 
H35A H 0.6227 -0.0681 0.2882 0.062 Uiso 1 1 calc R . . 
H35B H 0.5199 -0.0834 0.2078 0.062 Uiso 1 1 calc R . . 
C01 C 0.3795(7) 0.0618(3) 0.0385(4) 0.0725(19) Uani 1 1 d . . . 
H01A H 0.4560 0.0456 0.0749 0.087 Uiso 1 1 calc R . . 
H01B H 0.3281 0.0828 0.0663 0.087 Uiso 1 1 calc R . . 
Cl2 Cl 0.2930(2) 0.00222(8) -0.01232(11) 0.0869(6) Uani 1 1 d . . . 
Cl3 Cl 0.42435(19) 0.11494(8) -0.02125(11) 0.0810(5) Uani 1 1 d . . . 
C51 C 0.8038(9) -0.0422(4) 0.3355(6) 0.160(4) Uiso 0.50 1 d PD A -1 
H51A H 0.7757 -0.0755 0.2999 0.240 Uiso 0.50 1 calc PR A -1 
H51B H 0.8631 -0.0163 0.3196 0.240 Uiso 0.50 1 calc PR A -1 
H51C H 0.7307 -0.0181 0.3380 0.240 Uiso 0.50 1 calc PR A -1 
C52 C 0.8679(3) -0.0681(2) 0.4107(6) 0.160(4) Uiso 0.50 1 d PD A -1 
H52A H 0.8054 -0.0911 0.4285 0.192 Uiso 0.50 1 calc PR A -1 
H52B H 0.9341 -0.0969 0.4064 0.192 Uiso 0.50 1 calc PR A -1 
C53 C 0.92686(19) -0.0202(4) 0.4667(7) 0.160(4) Uiso 0.50 1 d PD A -1 
H53A H 0.9057 -0.0286 0.5134 0.192 Uiso 0.50 1 calc PR A -1 
H53B H 0.8905 0.0199 0.4481 0.192 Uiso 0.50 1 calc PR A -1 
C54 C 1.0676(2) -0.0172(3) 0.4830(7) 0.160(4) Uiso 0.50 1 d PD A -1 
H54A H 1.1040 -0.0573 0.5015 0.192 Uiso 0.50 1 calc PR A -1 
H54B H 1.0888 -0.0086 0.4363 0.192 Uiso 0.50 1 calc PR A -1 
C55 C 1.1266(3) 0.0306(7) 0.5392(11) 0.160(4) Uiso 0.50 1 d PD A -1 
H55A H 1.0962 0.0253 0.5833 0.192 Uiso 0.50 1 calc PR A -1 
H55B H 1.0990 0.0712 0.5179 0.192 Uiso 0.50 1 calc PR A -1 
C56 C 1.2681(3) 0.0281(8) 0.5628(10) 0.160(4) Uiso 0.50 1 d PD A -1 
H56A H 1.3019 0.0659 0.5887 0.240 Uiso 0.50 1 calc PR A -1 
H56B H 1.2982 0.0234 0.5190 0.240 Uiso 0.50 1 calc PR A -1 
H56C H 1.2966 -0.0065 0.5962 0.240 Uiso 0.50 1 calc PR A -1 
 
loop_ 
 _atom_site_aniso_label 
 _atom_site_aniso_U_11 
 _atom_site_aniso_U_22 
 _atom_site_aniso_U_33 
 _atom_site_aniso_U_23 
 _atom_site_aniso_U_13 
 _atom_site_aniso_U_12 
Pd1 0.0267(2) 0.0300(2) 0.0547(3) -0.00178(19) 0.01556(17) -0.00287(15) 
Pd2 0.0271(2) 0.0267(2) 0.0521(3) 0.00064(18) 0.01294(17) -0.00124(15) 
Br1 0.0325(3) 0.0301(3) 0.0720(4) -0.0018(3) 0.0235(3) 0.0002(2) 
P1 0.0292(7) 0.0336(7) 0.0562(8) -0.0060(7) 0.0183(6) -0.0054(6) 
P2 0.0278(6) 0.0282(7) 0.0460(7) -0.0001(6) 0.0125(5) -0.0009(5) 
N1 0.039(3) 0.042(3) 0.052(3) -0.008(2) 0.019(2) -0.007(2) 
N2 0.070(3) 0.034(3) 0.053(3) -0.006(2) 0.027(2) -0.007(2) 
C1 0.047(3) 0.056(4) 0.059(4) -0.011(3) 0.021(3) -0.016(3) 
C2 0.047(4) 0.070(4) 0.056(4) -0.005(3) 0.002(3) -0.006(3) 
C3 0.060(4) 0.066(4) 0.073(4) -0.023(4) 0.025(3) -0.022(3) 
C4 0.077(5) 0.087(5) 0.055(4) -0.014(4) 0.031(3) -0.027(4) 
C5 0.041(3) 0.029(3) 0.084(4) 0.003(3) 0.029(3) 0.001(2) 
C6 0.052(4) 0.029(3) 0.107(5) 0.001(3) 0.033(3) -0.005(3) 
C7 0.057(4) 0.047(4) 0.114(5) -0.011(4) 0.049(4) -0.002(3) 
C8 0.042(3) 0.044(4) 0.085(4) 0.010(3) 0.020(3) -0.001(3) 
C9 0.027(3) 0.030(3) 0.066(3) -0.001(3) 0.022(2) 0.001(2) 
C10 0.031(3) 0.041(3) 0.054(3) 0.000(3) 0.006(2) 0.001(2) 
C11 0.038(3) 0.037(3) 0.078(4) -0.006(3) 0.030(3) -0.001(2) 
C12 0.031(3) 0.044(3) 0.074(4) -0.006(3) 0.022(3) -0.008(2) 
C13 0.055(3) 0.038(3) 0.043(3) 0.002(3) 0.016(3) -0.005(3) 
C14 0.055(4) 0.054(4) 0.057(4) 0.015(3) 0.003(3) -0.004(3) 
C15 0.067(4) 0.056(4) 0.052(3) 0.004(3) 0.026(3) -0.006(3) 
C16 0.077(5) 0.059(4) 0.052(3) -0.011(3) 0.015(3) -0.013(3) 
C17 0.029(3) 0.037(3) 0.047(3) -0.004(3) 0.014(2) -0.002(2) 
C18 0.031(3) 0.036(3) 0.055(3) -0.011(3) 0.016(2) -0.007(2) 
C19 0.033(3) 0.040(3) 0.053(3) -0.009(3) 0.015(2) -0.007(2) 
C20 0.031(3) 0.032(3) 0.054(3) 0.003(3) 0.015(2) 0.005(2) 
C21 0.027(3) 0.033(3) 0.042(3) 0.001(2) 0.010(2) 0.004(2) 
C22 0.023(2) 0.030(3) 0.053(3) -0.001(3) 0.007(2) 0.000(2) 
C23 0.026(2) 0.024(2) 0.049(3) 0.005(2) 0.009(2) 0.0019(19) 
C24 0.029(3) 0.026(3) 0.046(3) 0.004(2) 0.012(2) 0.001(2) 
C25 0.033(3) 0.037(3) 0.047(3) 0.005(3) 0.017(2) 0.004(2) 
C26 0.032(3) 0.036(3) 0.044(3) 0.007(3) 0.009(2) 0.005(2) 
C27 0.032(3) 0.032(3) 0.049(3) 0.005(3) 0.015(2) -0.005(2) 
C28 0.031(3) 0.036(3) 0.046(3) 0.001(3) 0.016(2) 0.003(2) 
C29 0.046(3) 0.060(4) 0.069(4) -0.003(3) 0.033(3) -0.010(3) 
C30 0.038(3) 0.082(5) 0.050(3) -0.003(3) 0.016(3) 0.008(3) 
C31 0.070(4) 0.042(3) 0.051(3) -0.007(3) 0.016(3) 0.003(3) 
C32 0.093(5) 0.033(3) 0.059(4) -0.007(3) 0.025(3) -0.014(3) 
C33 0.038(3) 0.032(3) 0.070(4) 0.005(3) 0.013(3) -0.001(2) 
C34 0.040(3) 0.038(3) 0.115(5) 0.002(4) 0.029(3) 0.006(3) 
C35 0.027(3) 0.042(3) 0.088(4) 0.007(3) 0.018(3) 0.003(2) 
C01 0.092(5) 0.069(5) 0.056(4) -0.003(3) 0.019(3) 0.008(4) 
Cl2 0.1257(18) 0.0580(11) 0.0992(13) -0.0090(10) 0.0673(13) -0.0208(11) 
Cl3 0.0978(14) 0.0639(11) 0.0949(13) -0.0129(10) 0.0492(11) -0.0202(10) 
 
_geom_special_details 
; 
 All esds (except the esd in the dihedral angle between two l.s. planes) 
 are estimated using the full covariance matrix.  The cell esds are taken 
 into account individually in the estimation of esds in distances, angles 
 and torsion angles; correlations between esds in cell parameters are only 
 used when they are defined by crystal symmetry.  An approximate (isotropic) 
 treatment of cell esds is used for estimating esds involving l.s. planes. 
; 
 
loop_ 
 _geom_bond_atom_site_label_1 
 _geom_bond_atom_site_label_2 
 _geom_bond_distance 
 _geom_bond_site_symmetry_2 
 _geom_bond_publ_flag 
Pd1 P1 2.3038(13) . ? 
Pd1 Br1 2.5309(6) . ? 
Pd1 Pd2 2.6368(5) . ? 
Pd2 P2 2.3064(13) . ? 
Pd2 Br1 2.5379(6) . ? 
P1 C17 1.841(5) . ? 
P1 C5 1.894(6) . ? 
P1 C1 1.911(6) . ? 
P2 C23 1.817(5) . ? 
P2 C9 1.896(5) . ? 
P2 C13 1.903(5) . ? 
N1 C20 1.392(6) . ? 
N1 C30 1.441(7) . ? 
N1 C29 1.452(7) . ? 
N2 C26 1.379(7) . ? 
N2 C32 1.417(7) . ? 
N2 C31 1.449(7) . ? 
C1 C3 1.504(8) . ? 
C1 C2 1.524(8) . ? 
C1 C4 1.557(8) . ? 
C2 H2A 0.9800 . ? 
C2 H2B 0.9800 . ? 
C2 H2C 0.9800 . ? 
C3 H3A 0.9800 . ? 
C3 H3B 0.9800 . ? 
C3 H3C 0.9800 . ? 
C4 H4A 0.9800 . ? 
C4 H4B 0.9800 . ? 
C4 H4C 0.9800 . ? 
C5 C8 1.532(8) . ? 
C5 C6 1.538(7) . ? 
C5 C7 1.548(7) . ? 
C6 H6A 0.9800 . ? 
C6 H6B 0.9800 . ? 
C6 H6C 0.9800 . ? 
C7 H7A 0.9800 . ? 
C7 H7B 0.9800 . ? 
C7 H7C 0.9800 . ? 
C8 H8A 0.9800 . ? 
C8 H8B 0.9800 . ? 
C8 H8C 0.9800 . ? 
C9 C12 1.538(7) . ? 
C9 C10 1.550(7) . ? 
C9 C11 1.551(7) . ? 
C10 H10A 0.9800 . ? 
C10 H10B 0.9800 . ? 
C10 H10C 0.9800 . ? 
C11 H11A 0.9800 . ? 
C11 H11B 0.9800 . ? 
C11 H11C 0.9800 . ? 
C12 H12A 0.9800 . ? 
C12 H12B 0.9800 . ? 
C12 H12C 0.9800 . ? 
C13 C15 1.534(8) . ? 
C13 C14 1.542(8) . ? 
C13 C16 1.559(8) . ? 
C14 H14A 0.9800 . ? 
C14 H14B 0.9800 . ? 
C14 H14C 0.9800 . ? 
C15 H15A 0.9800 . ? 
C15 H15B 0.9800 . ? 
C15 H15C 0.9800 . ? 
C16 H16A 0.9800 . ? 
C16 H16B 0.9800 . ? 
C16 H16C 0.9800 . ? 
C17 C22 1.382(7) . ? 
C17 C18 1.401(6) . ? 
C18 C19 1.366(7) . ? 
C18 H18 0.9500 . ? 
C19 C20 1.409(7) . ? 
C19 H19 0.9500 . ? 
C20 C21 1.402(7) . ? 
C21 C22 1.375(6) . ? 
C21 H21 0.9500 . ? 
C22 H22 0.9500 . ? 
C23 C24 1.394(6) . ? 
C23 C28 1.399(6) . ? 
C24 C25 1.387(7) . ? 
C24 H24 0.9500 . ? 
C25 C26 1.409(7) . ? 
C25 H25 0.9500 . ? 
C26 C27 1.393(7) . ? 
C27 C28 1.395(7) . ? 
C27 H27 0.9500 . ? 
C28 H28 0.9500 . ? 
C29 H29A 0.9800 . ? 
C29 H29B 0.9800 . ? 
C29 H29C 0.9800 . ? 
C30 H30A 0.9800 . ? 
C30 H30B 0.9800 . ? 
C30 H30C 0.9800 . ? 
C31 H31A 0.9800 . ? 
C31 H31B 0.9800 . ? 
C31 H31C 0.9800 . ? 
C32 H32A 0.9800 . ? 
C32 H32B 0.9800 . ? 
C32 H32C 0.9800 . ? 
C33 C34 1.408(8) . ? 
C33 H33A 0.9500 . ? 
C33 H33B 0.9500 . ? 
C34 C35 1.392(8) . ? 
C34 H34 0.9500 . ? 
C35 H35A 0.9500 . ? 
C35 H35B 0.9500 . ? 
C01 Cl2 1.738(7) . ? 
C01 Cl3 1.789(7) . ? 
C01 H01A 0.9900 . ? 
C01 H01B 0.9900 . ? 
C51 C52 1.50001(11) . ? 
C51 H51A 0.9800 . ? 
C51 H51B 0.9800 . ? 
C51 H51C 0.9800 . ? 
C52 C53 1.50000(11) . ? 
C52 H52A 0.9900 . ? 
C52 H52B 0.9900 . ? 
C53 C54 1.50001(16) . ? 
C53 H53A 0.9900 . ? 
C53 H53B 0.9900 . ? 
C54 C55 1.50002(17) . ? 
C54 H54A 0.9900 . ? 
C54 H54B 0.9900 . ? 
C55 C56 1.50000(12) . ? 
C55 H55A 0.9900 . ? 
C55 H55B 0.9900 . ? 
C56 H56A 0.9800 . ? 
C56 H56B 0.9800 . ? 
C56 H56C 0.9800 . ? 
 
loop_ 
 _geom_angle_atom_site_label_1 
 _geom_angle_atom_site_label_2 
 _geom_angle_atom_site_label_3 
 _geom_angle 
 _geom_angle_site_symmetry_1 
 _geom_angle_site_symmetry_3 
 _geom_angle_publ_flag 
P1 Pd1 Br1 113.07(4) . . ? 
P1 Pd1 Pd2 168.73(4) . . ? 
Br1 Pd1 Pd2 58.784(16) . . ? 
P2 Pd2 Br1 113.40(4) . . ? 
P2 Pd2 Pd1 168.96(4) . . ? 
Br1 Pd2 Pd1 58.524(16) . . ? 
Pd1 Br1 Pd2 62.692(17) . . ? 
C17 P1 C5 102.0(2) . . ? 
C17 P1 C1 107.5(2) . . ? 
C5 P1 C1 110.5(3) . . ? 
C17 P1 Pd1 113.77(17) . . ? 
C5 P1 Pd1 112.98(18) . . ? 
C1 P1 Pd1 109.78(18) . . ? 
C23 P2 C9 102.1(2) . . ? 
C23 P2 C13 107.5(2) . . ? 
C9 P2 C13 110.9(2) . . ? 
C23 P2 Pd2 113.84(16) . . ? 
C9 P2 Pd2 113.43(16) . . ? 
C13 P2 Pd2 108.79(17) . . ? 
C20 N1 C30 118.0(4) . . ? 
C20 N1 C29 118.7(4) . . ? 
C30 N1 C29 117.6(4) . . ? 
C26 N2 C32 120.7(4) . . ? 
C26 N2 C31 119.8(4) . . ? 
C32 N2 C31 118.4(4) . . ? 
C3 C1 C2 109.0(5) . . ? 
C3 C1 C4 107.4(5) . . ? 
C2 C1 C4 109.1(5) . . ? 
C3 C1 P1 118.5(5) . . ? 
C2 C1 P1 106.7(4) . . ? 
C4 C1 P1 105.9(4) . . ? 
C1 C2 H2A 109.5 . . ? 
C1 C2 H2B 109.5 . . ? 
H2A C2 H2B 109.5 . . ? 
C1 C2 H2C 109.5 . . ? 
H2A C2 H2C 109.5 . . ? 
H2B C2 H2C 109.5 . . ? 
C1 C3 H3A 109.5 . . ? 
C1 C3 H3B 109.5 . . ? 
H3A C3 H3B 109.5 . . ? 
C1 C3 H3C 109.5 . . ? 
H3A C3 H3C 109.5 . . ? 
H3B C3 H3C 109.5 . . ? 
C1 C4 H4A 109.5 . . ? 
C1 C4 H4B 109.5 . . ? 
H4A C4 H4B 109.5 . . ? 
C1 C4 H4C 109.5 . . ? 
H4A C4 H4C 109.5 . . ? 
H4B C4 H4C 109.5 . . ? 
C8 C5 C6 108.9(5) . . ? 
C8 C5 C7 108.7(5) . . ? 
C6 C5 C7 109.1(5) . . ? 
C8 C5 P1 106.2(4) . . ? 
C6 C5 P1 113.8(4) . . ? 
C7 C5 P1 110.0(4) . . ? 
C5 C6 H6A 109.5 . . ? 
C5 C6 H6B 109.5 . . ? 
H6A C6 H6B 109.5 . . ? 
C5 C6 H6C 109.5 . . ? 
H6A C6 H6C 109.5 . . ? 
H6B C6 H6C 109.5 . . ? 
C5 C7 H7A 109.5 . . ? 
C5 C7 H7B 109.5 . . ? 
H7A C7 H7B 109.5 . . ? 
C5 C7 H7C 109.5 . . ? 
H7A C7 H7C 109.5 . . ? 
H7B C7 H7C 109.5 . . ? 
C5 C8 H8A 109.5 . . ? 
C5 C8 H8B 109.5 . . ? 
H8A C8 H8B 109.5 . . ? 
C5 C8 H8C 109.5 . . ? 
H8A C8 H8C 109.5 . . ? 
H8B C8 H8C 109.5 . . ? 
C12 C9 C10 108.4(4) . . ? 
C12 C9 C11 110.2(4) . . ? 
C10 C9 C11 107.4(4) . . ? 
C12 C9 P2 114.6(4) . . ? 
C10 C9 P2 105.1(3) . . ? 
C11 C9 P2 110.7(3) . . ? 
C9 C10 H10A 109.5 . . ? 
C9 C10 H10B 109.5 . . ? 
H10A C10 H10B 109.5 . . ? 
C9 C10 H10C 109.5 . . ? 
H10A C10 H10C 109.5 . . ? 
H10B C10 H10C 109.5 . . ? 
C9 C11 H11A 109.5 . . ? 
C9 C11 H11B 109.5 . . ? 
H11A C11 H11B 109.5 . . ? 
C9 C11 H11C 109.5 . . ? 
H11A C11 H11C 109.5 . . ? 
H11B C11 H11C 109.5 . . ? 
C9 C12 H12A 109.5 . . ? 
C9 C12 H12B 109.5 . . ? 
H12A C12 H12B 109.5 . . ? 
C9 C12 H12C 109.5 . . ? 
H12A C12 H12C 109.5 . . ? 
H12B C12 H12C 109.5 . . ? 
C15 C13 C14 108.9(5) . . ? 
C15 C13 C16 108.6(5) . . ? 
C14 C13 C16 107.7(5) . . ? 
C15 C13 P2 117.6(4) . . ? 
C14 C13 P2 107.1(4) . . ? 
C16 C13 P2 106.5(4) . . ? 
C13 C14 H14A 109.5 . . ? 
C13 C14 H14B 109.5 . . ? 
H14A C14 H14B 109.5 . . ? 
C13 C14 H14C 109.5 . . ? 
H14A C14 H14C 109.5 . . ? 
H14B C14 H14C 109.5 . . ? 
C13 C15 H15A 109.5 . . ? 
C13 C15 H15B 109.5 . . ? 
H15A C15 H15B 109.5 . . ? 
C13 C15 H15C 109.5 . . ? 
H15A C15 H15C 109.5 . . ? 
H15B C15 H15C 109.5 . . ? 
C13 C16 H16A 109.5 . . ? 
C13 C16 H16B 109.5 . . ? 
H16A C16 H16B 109.5 . . ? 
C13 C16 H16C 109.5 . . ? 
H16A C16 H16C 109.5 . . ? 
H16B C16 H16C 109.5 . . ? 
C22 C17 C18 116.3(4) . . ? 
C22 C17 P1 117.9(4) . . ? 
C18 C17 P1 125.6(4) . . ? 
C19 C18 C17 121.9(5) . . ? 
C19 C18 H18 119.0 . . ? 
C17 C18 H18 119.0 . . ? 
C18 C19 C20 121.7(5) . . ? 
C18 C19 H19 119.1 . . ? 
C20 C19 H19 119.1 . . ? 
N1 C20 C21 122.7(5) . . ? 
N1 C20 C19 121.2(4) . . ? 
C21 C20 C19 116.1(4) . . ? 
C22 C21 C20 121.2(5) . . ? 
C22 C21 H21 119.4 . . ? 
C20 C21 H21 119.4 . . ? 
C21 C22 C17 122.7(5) . . ? 
C21 C22 H22 118.6 . . ? 
C17 C22 H22 118.6 . . ? 
C24 C23 C28 115.6(4) . . ? 
C24 C23 P2 118.9(3) . . ? 
C28 C23 P2 125.3(4) . . ? 
C25 C24 C23 122.5(4) . . ? 
C25 C24 H24 118.7 . . ? 
C23 C24 H24 118.7 . . ? 
C24 C25 C26 121.4(5) . . ? 
C24 C25 H25 119.3 . . ? 
C26 C25 H25 119.3 . . ? 
N2 C26 C27 121.1(5) . . ? 
N2 C26 C25 122.1(4) . . ? 
C27 C26 C25 116.7(5) . . ? 
C26 C27 C28 120.9(5) . . ? 
C26 C27 H27 119.5 . . ? 
C28 C27 H27 119.5 . . ? 
C27 C28 C23 122.8(5) . . ? 
C27 C28 H28 118.6 . . ? 
C23 C28 H28 118.6 . . ? 
N1 C29 H29A 109.5 . . ? 
N1 C29 H29B 109.5 . . ? 
H29A C29 H29B 109.5 . . ? 
N1 C29 H29C 109.5 . . ? 
H29A C29 H29C 109.5 . . ? 
H29B C29 H29C 109.5 . . ? 
N1 C30 H30A 109.5 . . ? 
N1 C30 H30B 109.5 . . ? 
H30A C30 H30B 109.5 . . ? 
N1 C30 H30C 109.5 . . ? 
H30A C30 H30C 109.5 . . ? 
H30B C30 H30C 109.5 . . ? 
N2 C31 H31A 109.5 . . ? 
N2 C31 H31B 109.5 . . ? 
H31A C31 H31B 109.5 . . ? 
N2 C31 H31C 109.5 . . ? 
H31A C31 H31C 109.5 . . ? 
H31B C31 H31C 109.5 . . ? 
N2 C32 H32A 109.5 . . ? 
N2 C32 H32B 109.5 . . ? 
H32A C32 H32B 109.5 . . ? 
N2 C32 H32C 109.5 . . ? 
H32A C32 H32C 109.5 . . ? 
H32B C32 H32C 109.5 . . ? 
C34 C33 H33A 120.0 . . ? 
C34 C33 H33B 120.0 . . ? 
H33A C33 H33B 120.0 . . ? 
C35 C34 C33 130.4(7) . . ? 
C35 C34 H34 114.8 . . ? 
C33 C34 H34 114.8 . . ? 
C34 C35 H35A 120.0 . . ? 
C34 C35 H35B 120.0 . . ? 
H35A C35 H35B 120.0 . . ? 
Cl2 C01 Cl3 110.8(3) . . ? 
Cl2 C01 H01A 109.5 . . ? 
Cl3 C01 H01A 109.5 . . ? 
Cl2 C01 H01B 109.5 . . ? 
Cl3 C01 H01B 109.5 . . ? 
H01A C01 H01B 108.1 . . ? 
C52 C51 H51A 109.5 . . ? 
C52 C51 H51B 109.6 . . ? 
H51A C51 H51B 109.5 . . ? 
C52 C51 H51C 109.4 . . ? 
H51A C51 H51C 109.5 . . ? 
H51B C51 H51C 109.5 . . ? 
C53 C52 C51 112.885(11) . . ? 
C53 C52 H52A 109.0 . . ? 
C51 C52 H52A 109.1 . . ? 
C53 C52 H52B 109.0 . . ? 
C51 C52 H52B 108.9 . . ? 
H52A C52 H52B 107.8 . . ? 
C52 C53 C54 112.885(11) . . ? 
C52 C53 H53A 109.0 . . ? 
C54 C53 H53A 109.2 . . ? 
C52 C53 H53B 109.0 . . ? 
C54 C53 H53B 108.8 . . ? 
H53A C53 H53B 107.8 . . ? 
C55 C54 C53 112.884(14) . . ? 
C55 C54 H54A 108.8 . . ? 
C53 C54 H54A 108.8 . . ? 
C55 C54 H54B 109.2 . . ? 
C53 C54 H54B 109.2 . . ? 
H54A C54 H54B 107.8 . . ? 
C54 C55 C56 112.884(14) . . ? 
C54 C55 H55A 109.2 . . ? 
C56 C55 H55A 109.0 . . ? 
C54 C55 H55B 108.8 . . ? 
C56 C55 H55B 109.0 . . ? 
H55A C55 H55B 107.8 . . ? 
C55 C56 H56A 109.4 . . ? 
C55 C56 H56B 109.5 . . ? 
H56A C56 H56B 109.5 . . ? 
C55 C56 H56C 109.5 . . ? 
H56A C56 H56C 109.5 . . ? 
H56B C56 H56C 109.5 . . ? 
 
_diffrn_measured_fraction_theta_max    0.960 
_diffrn_reflns_theta_full              27.87 
_diffrn_measured_fraction_theta_full   0.960 
_refine_diff_density_max    2.064 
_refine_diff_density_min   -1.205 
_refine_diff_density_rms    0.117 
